# Supplementary material for: CMDB: the comprehensive population genome variation database of China
Source: PubMed Central journal article supplement — Nucleic Acids Res. 2022 Jul 25;51(D1):D890–5. doi: 10.1093/nar/gkac638 (PMC9825573; doi:10.1093/nar/gkac638), 2022-07-25
Supplement: gkac638_supplemental_file.pdf [file gkac638_supplemental_file.pdf]

## Supplementary data

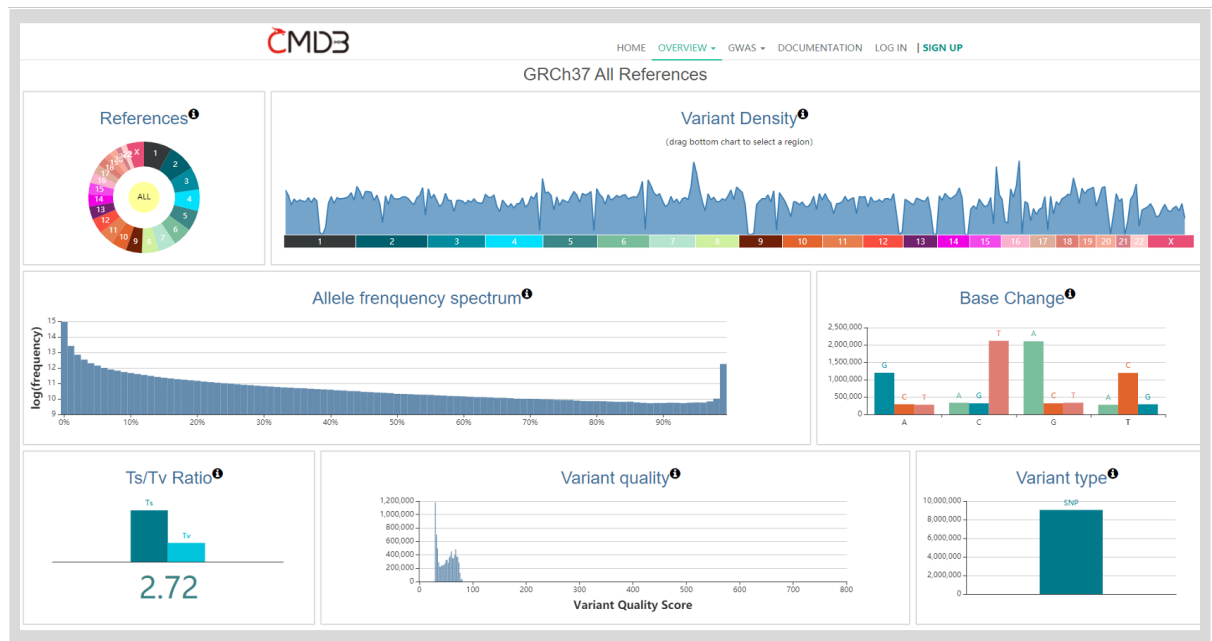

Figure S1. The distribution statistics of variants on all chromosomes based on GRCh37.
